# Supplementary material for: Efficiency and Kinetics of Assam Crude Oil Degradation by Pseudomonas Aeruginosa AKS1&nbsp;and Bacillus Sp. AKS2
Source: Research Square preprint supplement (doi:10.21203/rs.3.rs-280894/v1), 2021-03-08
Supplement: Supplementary file 1 [file 73d0390c7cd21b1acb1f6dfa.docx]

**Efficiency and kinetics of Assam crude oil degradation by *Pseudomonas aeruginosa* AKS1 and *Bacillus* sp. AKS2**

Bobby Chettri, Ningombam A. Singha, Arvind Kumar Singh*

Department of Biochemistry, North-Eastern Hill University, Shillong - 793022, India

**Supplementary material**

**Table S1**: Characteristics of primers used in this study

**Primer Sequence Length (bp) Annealing temp. Reference**

AlkB-PA-2F 5’-TAGGCATGGTGGTCGGAATG-3’ 20 57.2 This study

AlkB-PA-2R 5’-GGGAGCGATCTTCTTCCTCG-3’ 20 57.3

AlkB gene-F 5’- CAGCATCCAGGCAGAGGAAA-3’ 20 57.5 This study

AlkB gene-R 5’-TGTAACACAGGGCGTTACCC-3’ 20 57.3

KKF 5’-AAYACNGCNCAYGARCTNGGN 26 62.4 (Kloos et al. 2006)

CAYAA-3,

KKR 5’-GCRTGRTGRTCNGARTGNCGYTG-3’ 23 61.6

**Figure S1**: PCR amplification was done by using primer pairs KKF & KKR (Lane 1, 2, & 3), AlkB-PA-2F/ AlkB-PA-2R (Lane 4, 5, & 6), and AlkB gene-F/AlkB gene-R (Lane 6, 7, & 8). Lane M, 100 to 1000 bp marker; lanes 1, 4 and 7: *P. aeruginosa* AKS1; lanes 2, 5 and 8: *Bacillus* sp. AKS2; lanes 3, 6 and 9: negative controls. Expected amplicons of 190 bp and 200 bp were obtained on PCR with primer pairs AlkB-PA-2F/ AlkB-PA-2R and AlkB gene-F/AlkB gene-R respectively.


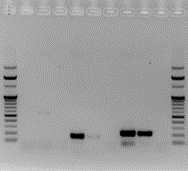


M 1 2 3 4 5 6 7 8 9 M

1300 bp

1200 bp

1000 bp

500 bp

200 bp

100 bp

A

B

C
